# Supplementary material
Source: publisher figshare collection journal article supplement (https://tandf.figshare.com/ndownloader/files/14883383)
Supplement: Supplementary file 1 [file 14883383]

**Table 1 Antibacterial effect and minimal inhibitory concentration (MIC) of ROX and TH against the two tested microorganisms**

| **Antimicrobial agent** | | **Microorganisms** | |
| --- | --- | --- | --- |
| **ROX/mg (25mL)** | **TH/mg(25mL)** | ***E. coli*** | ***S. aureus*** |
| 3 | 4 | + | + |
| 6 | 8 | - | - |
| 18 | 24 | - | - |
| 30 | 40 | - | - |
| 42  54 | 56  72 | -  - | -  - |

- Represent for no bacteria growing, + represent for small amount of bacteria growing.
